# Supplementary material
Source: MDPI journal article supplement (https://www.mdpi.com/2036-7449/15/2/22)
Supplement: s1 [file s1]

# Healthcare workers attitude towards Third dose COVID- 19 vaccines in Jordan

The results of this survey will provide us insights in how the healthcare workers interact with COVID-19 vaccines especially the third dose. But we will not spam you in any way! So do not worry, you will remain completely anonymous.

**\*Required**

1. Age \*

---

2. Gender \*

*Mark only one oval.*

☐ Male

☐ Female

3. What is your current marital status? \*

*Mark only one oval.*

☐ single

☐ married without children

☐ married with children

4. What is your profession in the healthcare field? \*

*Mark only one oval.*

- ☐ medical doctor-surgeon
- ☐ medical doctor-internal medicine
- ☐ medical doctor-pediatrics
- ☐ medical doctor-OB/GYN
- ☐ medical doctor-family medicine
- ☐ medical doctor-anesthesiologist
- ☐ medical doctor-lab medicine
- ☐ medical doctor-general practice
- ☐ medical doctor-other
- ☐ medical student
- ☐ nurse-practicing
- ☐ nurse-academic
- ☐ nursing student
- ☐ dentist
- ☐ dental student
- ☐ pharmacist
- ☐ pharmacy student
- ☐ research-principal investigator
- ☐ research-post doctorate
- ☐ research-PhD student
- ☐ nutritionist
- ☐ physiotherapist

5. place of work \*

*Mark only one oval.*

- ☐ university hospitaly
- ☐ Royal Medical Services
- ☐ MOH
- ☐ private sector

6. Location of work? \*

*Mark only one oval.*

- ☐ Irbid
- ☐ Mafraq
- ☐ Zarqa
- ☐ Ajloun
- ☐ Jerash
- ☐ Amman
- ☐ Madaba
- ☐ Balqa
- ☐ Karak
- ☐ Tafilah
- ☐ Maan
- ☐ Aqaba

7. Nature of work: \*

*Mark only one oval.*

- ☐ Work clinically,without direct contact with patients
- ☐ work clinically,with direct contact with patients
- ☐ work clinically,with direct contact with COVID-19 patients
- ☐ No clinical work

8. history of COVID-19 infection: \*

*Mark only one oval.*

- ☐ yes
- ☐ no
- ☐ do not know

Healthcare  
workers  
attitude  
towards  
Third dose  
COVID-19  
vaccines  
in Jordan

The results of this survey will provide us insights in how the healthcare workers interact with COVID-19 vaccines especially the third dose. But we will not spam you in any way! So do not worry, you will remain completely anonymous.

9. Age \*

---

10. Gender \*

*Mark only one oval.*

☐ Male

☐ Female

11. What is your current marital status? \*

*Mark only one oval.*

☐ single

☐ married without children

☐ married with children

12. What is your profession in the healthcare field? \*

*Mark only one oval.*

- ☐ medical doctor-surgeon
- ☐ medical doctor-internal medicine
- ☐ medical doctor-pediatrics
- ☐ medical doctor-OB/GYN
- ☐ medical doctor-family medicine
- ☐ medical doctor-anesthesiologist
- ☐ medical doctor-lab medicine
- ☐ medical doctor-general practice
- ☐ medical doctor-other
- ☐ medical student
- ☐ nurse-practicing
- ☐ nurse-academic
- ☐ nursing student
- ☐ dentist
- ☐ dental student
- ☐ pharmacist
- ☐ pharmacy student
- ☐ research-principal investigator
- ☐ research-post doctorate
- ☐ research-PhD student
- ☐ nutritionist
- ☐ physiotherapist

13. place of work \*

*Mark only one oval.*

- ☐ university hospitaly
- ☐ Royal Medical Services
- ☐ MOH
- ☐ private sector

14. Location of work? \*

*Mark only one oval.*

- ☐ Irbid
- ☐ Mafrag
- ☐ Zarqa
- ☐ Ajloun
- ☐ Jerash
- ☐ Amman
- ☐ Madaba
- ☐ Balqa
- ☐ Karak
- ☐ Tafeleh
- ☐ Maan
- ☐ Aqaba



15. Nature of work: \*

*Mark only one oval.*

- ☐ Work clinically,without direct contact with patients
- ☐ work clinically,with direct contact with patients
- ☐ work clinically,with direct contact with COVID-19 patients
- ☐ No clinical work

16. history of COVID-19 infection: \*

*Mark only one oval.*

- ☐ yes
- ☐ no
- ☐ do not know

Healthcare workers attitude towards  
COVID-19 vaccines in Jordan

17. If Third dose COVID-19 vaccines \*  
were available at your work place,  
would you be willing to recommend it  
to your patients?

*Mark only one oval.*

- ☐ yes,certainly  
☐ yes,probably  
☐ No,probably not  
☐ No,certainly not  
☐ Do not know

18. If Third dose COVID-19 vaccines \*  
were available at your work place,  
would you be willing to be vaccinated  
yourself?

*Mark only one oval.*

- ☐ yes,certainly  
☐ yes,probably  
☐ No,probably not  
☐ No,certainly not  
☐ Do not know

19. How much do you rate your Third dose COVID-19 vaccine acceptance? \*

*Mark only one oval.*

- ☐ High
- ☐ Moderate
- ☐ Hesitancy/reluctance

20. Were you vaccinated against seasonal influenza for the winter 2020/21 season? \*

*Mark only one oval.*

- ☐ Yes
- ☐ No
- ☐ Do not know

21. Do you sometimes hesitate to recommend \*  
booster dose of vaccines for your patients, for  
example, when you have questions about  
their benefits or risks?

*Mark only one oval per row.*

Never      sometimes      often      alw

---

**For  
adults  
(≥ 18  
years  
old)  
with a  
chronic  
diseas**

☐ ☐ ☐ ☐

---

**Among  
adults  
aged ≥  
65  
years  
old**

☐ ☐ ☐ ☐

22. The safety of a vaccine developed in \*  
an emergency, during an epidemic,  
cannot be considered guaranteed

*Mark only one oval.*

- ☐ Agree  
☐ Disagree  
☐ Do not know

23. In your opinion, for the population as a whole, how serious is COVID-19 on a scale of 0 to 10? \*

*Mark only one oval.*

low

\_\_\_\_\_

0

☐

\_\_\_\_\_

1

☐

\_\_\_\_\_

2

☐

\_\_\_\_\_

3

☐

\_\_\_\_\_

4

☐

\_\_\_\_\_

5

☐

\_\_\_\_\_

6

☐

\_\_\_\_\_

7

☐

\_\_\_\_\_

8

☐

\_\_\_\_\_

9

☐

\_\_\_\_\_

10

☐

\_\_\_\_\_

high

\_\_\_\_\_

24. It is preferable to acquire immunity against infectious diseases naturally (by having the disease) than by vaccination \*

*Mark only one oval.*

- ☐ Agree
- ☐ Disagree
- ☐ Do not know

25. I trust science to develop safe effective new vaccines \*

*Mark only one oval.*

- ☐ Agree
- ☐ Disagree
- ☐ Do not know

26. I trust the ministry of health to ensure that the booster dose of COVID-19 vaccines are safe \*

*Mark only one oval.*

- ☐ Agree
- ☐ Disagree
- ☐ Do not know

27. I prefer to wait for more scientific \*  
reviews about the safety and efficacy  
of the Third dose COVID-19 vaccines

*Mark only one oval.*

- ☐ Agree
- ☐ Disagree
- ☐ Do not know

---

This content is neither created nor endorsed by Google.

Google Forms
